# Supplementary material for: A three-dimensional simulation and process analysis of tropospheric Ozone Depletion Events (ODEs) during the springtime of Arctic using CMAQ
Source: Copernicus journal article supplement (doi:10.5194/egusphere-2022-370), 2022-06-13
Supplement: Supplementary file 1 [file egusphere-2022-370-supplement.pdf]

# A three-dimensional simulation and process analysis of tropospheric Ozone Depletion Events (ODEs) during the springtime of Arctic using CMAQ: Supplements

Simeng Li<sup>1</sup>, Le Cao<sup>1</sup>, Yicheng Gu<sup>1</sup>, and Yuhan Luo<sup>2</sup>

<sup>1</sup>Key Laboratory for Aerosol-Cloud-Precipitation of China Meteorological Administration, Nanjing University of Information Science and Technology, Nanjing, 210044, China

<sup>2</sup>Key Laboratory of Environmental Optics and Technology, Anhui Institute of Optics and Fine Mechanics, Chinese Academy of Sciences, Hefei, 230031, China

**Correspondence:** Le Cao (le.cao@nuist.edu.cn)

**Table S1.** Values of statistical parameters for simulations of meteorological parameters and the surface ozone at Barrow (now known as Utqiagvik).

| Variables     | R     | RMSEs     |
|---------------|-------|-----------|
| Pressure      | 0.991 | 3.081 hPa |
| T2            | 0.920 | 3.784 K   |
| U10           | 0.881 | 2.153 m/s |
| V10           | 0.897 | 2.282 m/s |
| Surface ozone | 0.793 | 8.407 ppb |

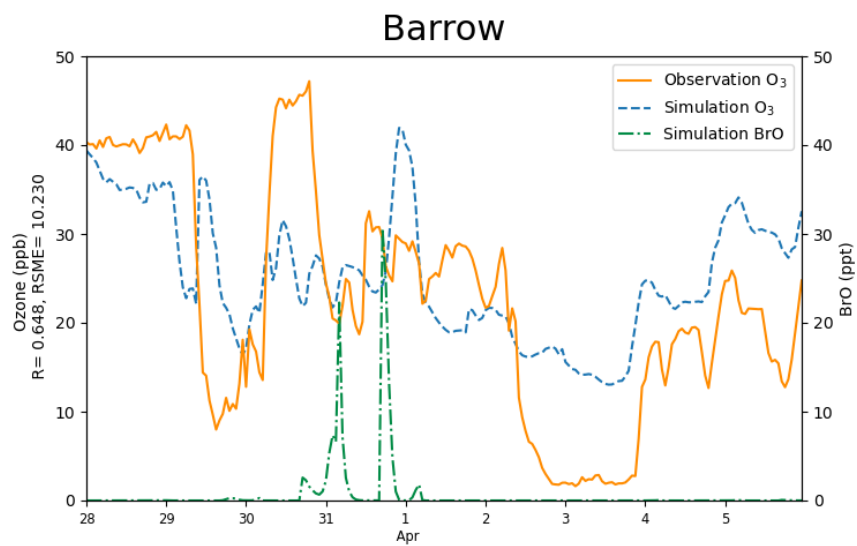

**Figure S1.** The simulated surface ozone (ppb) in Barrow from March 28th to April 6th, 2019 without the adjustment at the Chukotka Peninsula in the boundary condition, together with the simulated BrO. The correlation coefficient R and the root-mean-square errors RMSE were also presented.

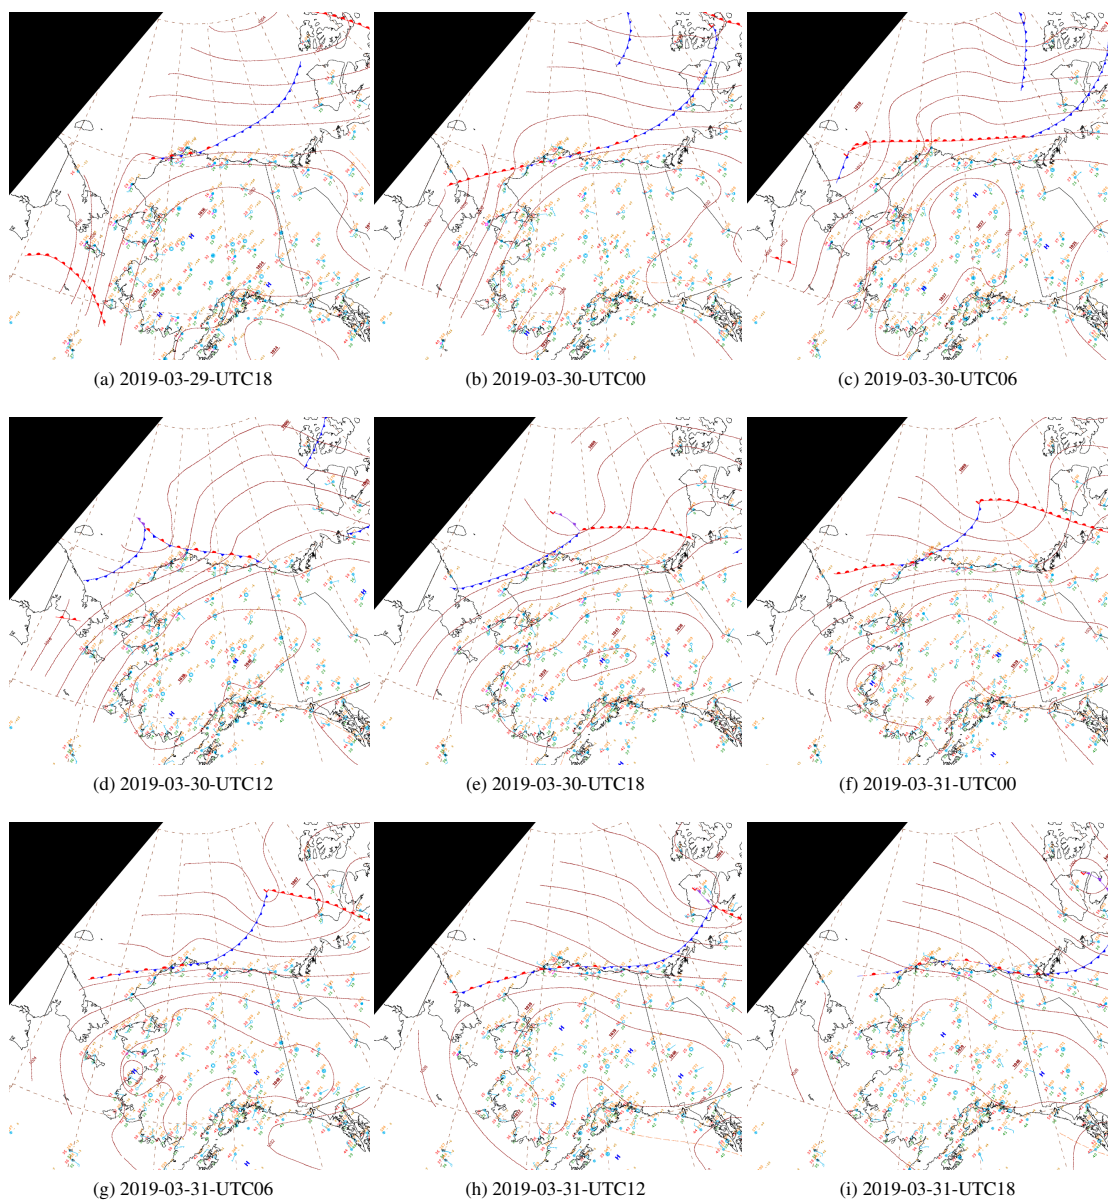

**Figure S2.** The surface analysis provided by Weather Prediction Center (WPC) from March 29th to March 31st, 2019.

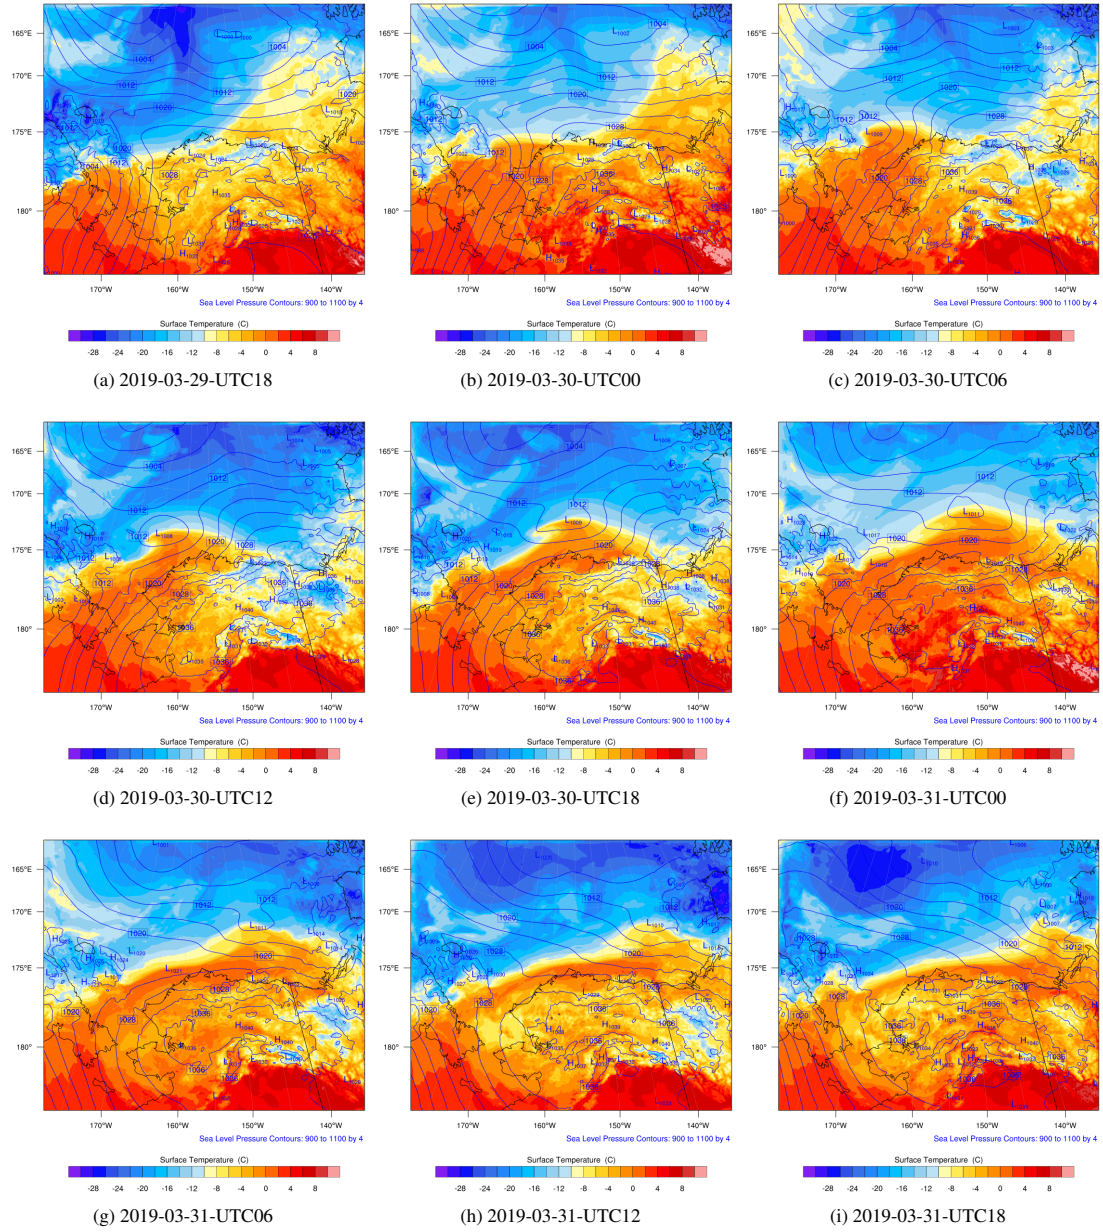

**Figure S3.** The spatial distribution of the sea level pressure (hPa, contour lines) and surface temperature ( $^{\circ}\text{C}$ , contour fills) simulated by WRF from March 29th to March 31st, 2019, with a time resolution of 6 hrs.



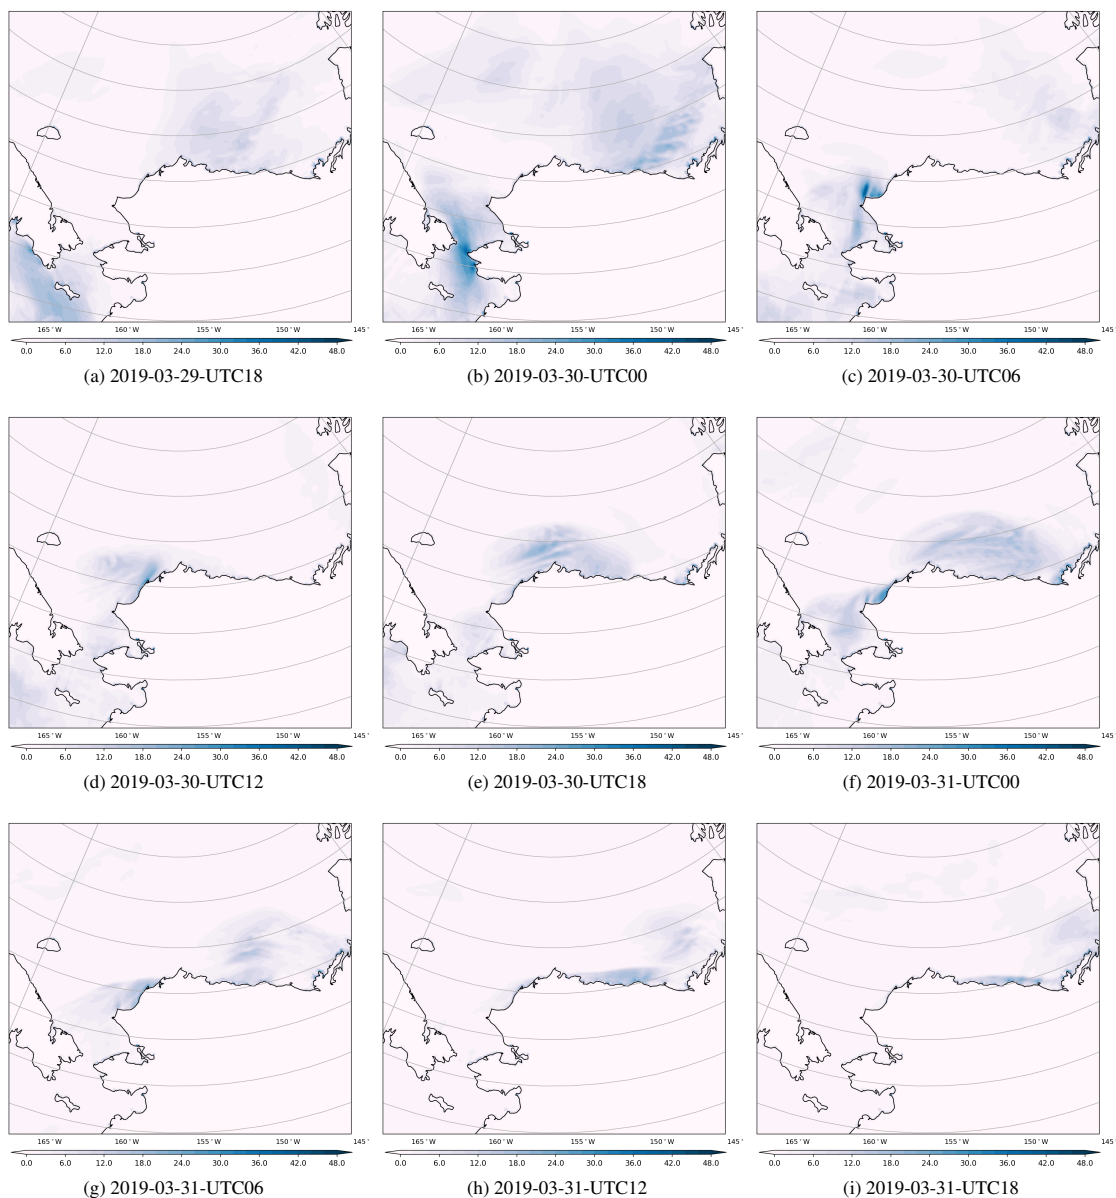

**Figure S4.** The spatial distribution of the emission rate of sea-salt aerosols (g/s) simulated by CMAQ from March 29th to March 31st, 2019.

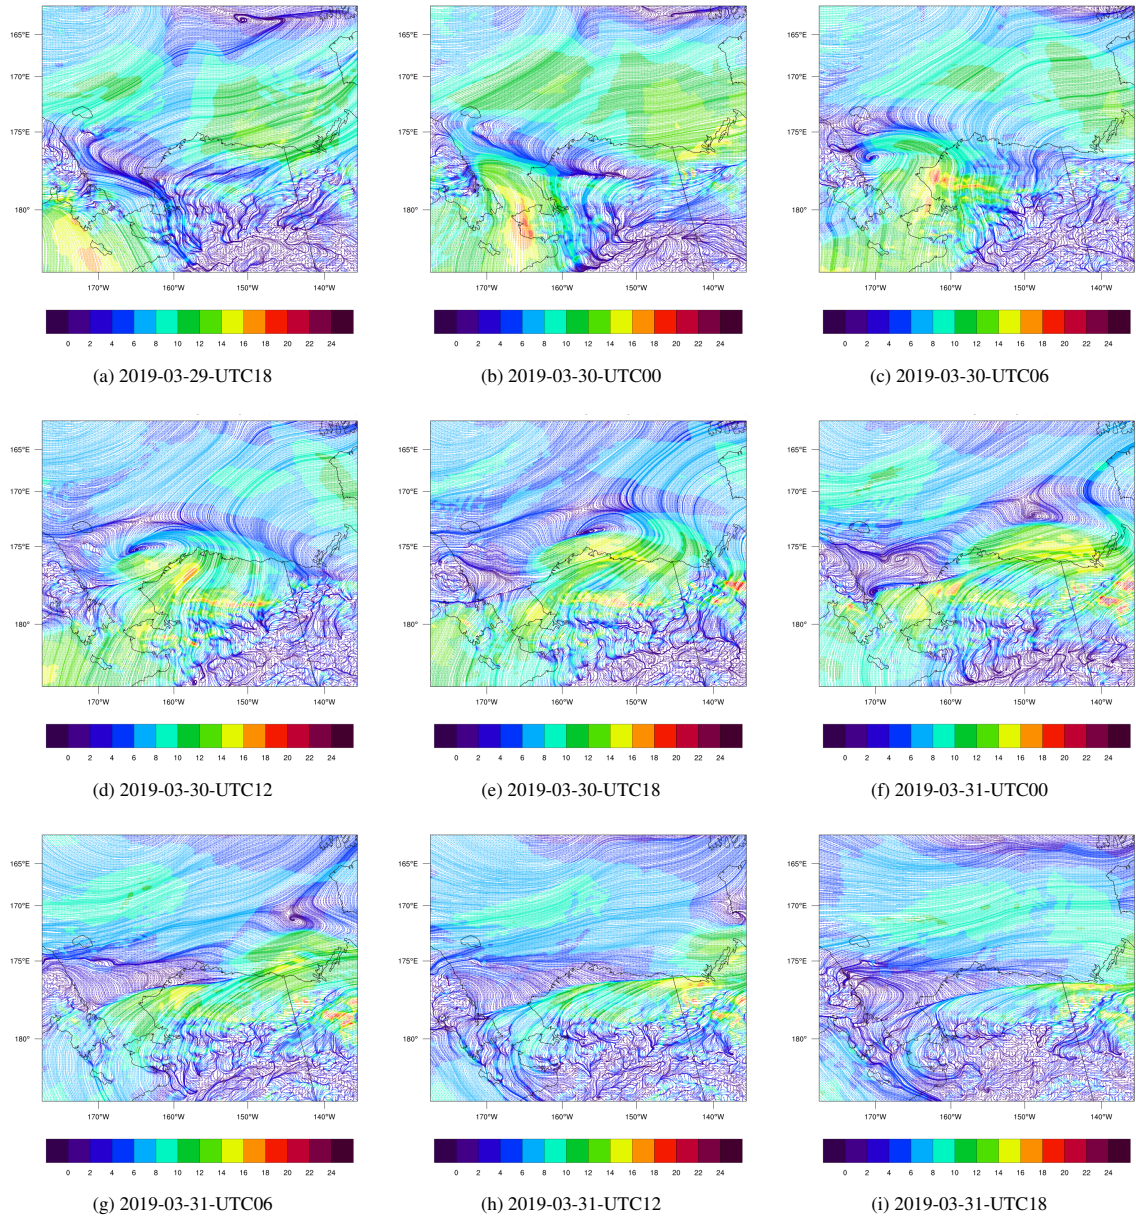

**Figure S5.** The spatial distribution of surface wind (m/s) and the streamline simulated by WRF from March 29th to March 31st, 2019, with a time resolution of 6 hrs.

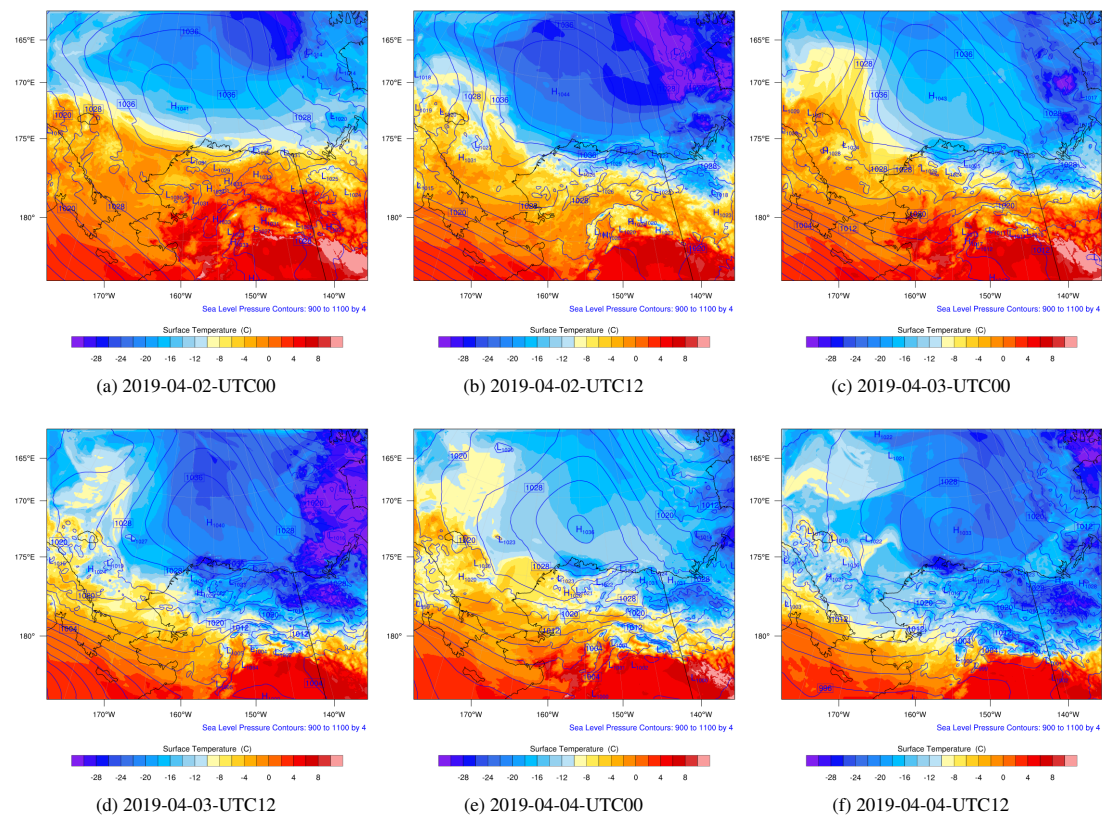

**Figure S6.** The spatial distribution of the sea level pressure (hPa, contour lines) and surface temperature (°C, contour fills) simulated by WRF from April 2nd to April 4th, 2019.



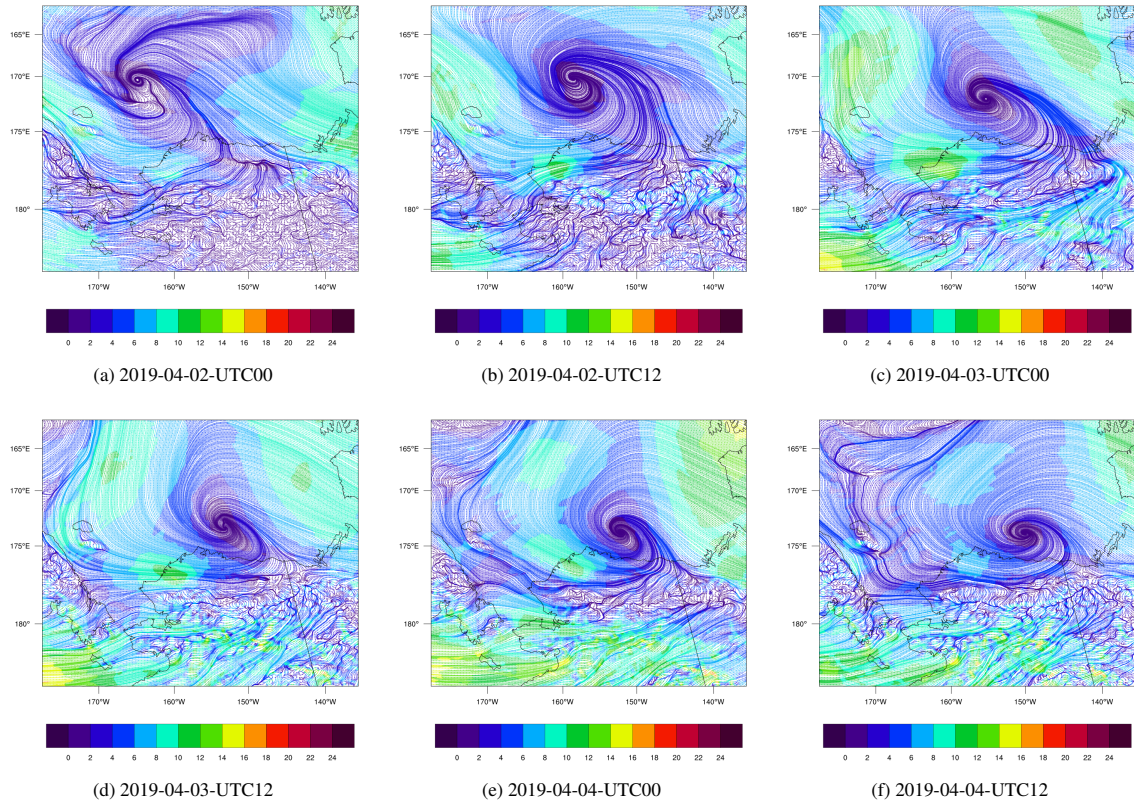

**Figure S7.** The spatial distribution of surface wind (m/s) and the streamline simulated by WRF from April 2nd to April 4th, 2019.

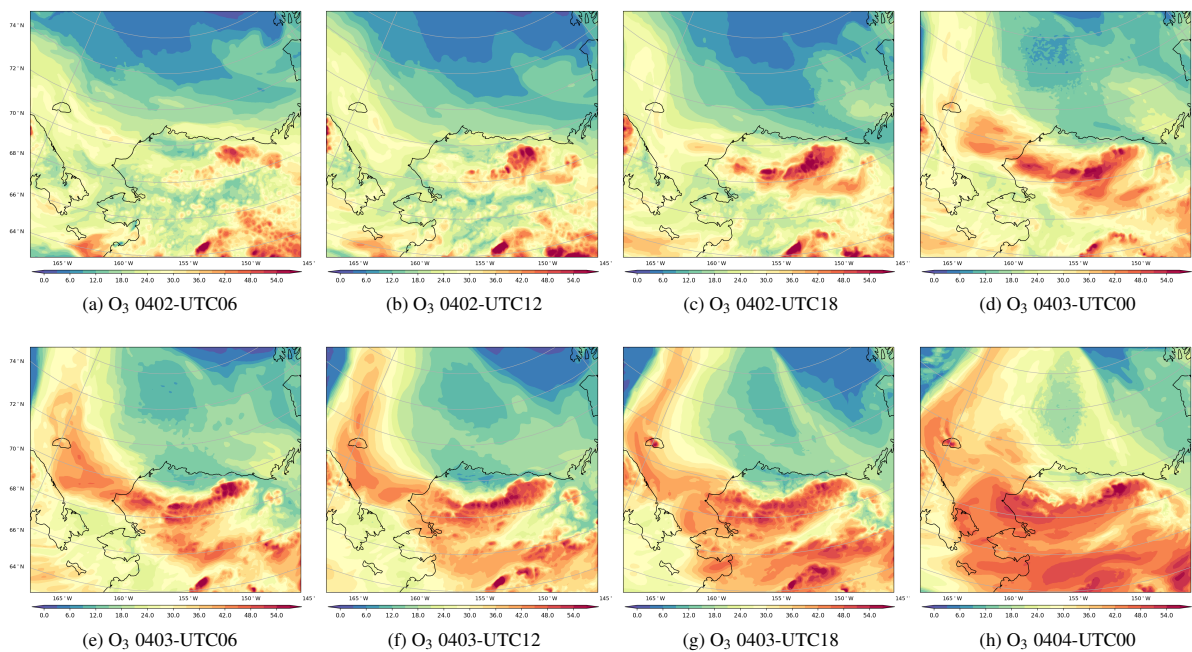

**Figure S8.** The spatial distribution of the surface ozone (ppb) simulated by CMAQ from April 2nd to 4th, 2019, with a time resolution of 6 hrs.

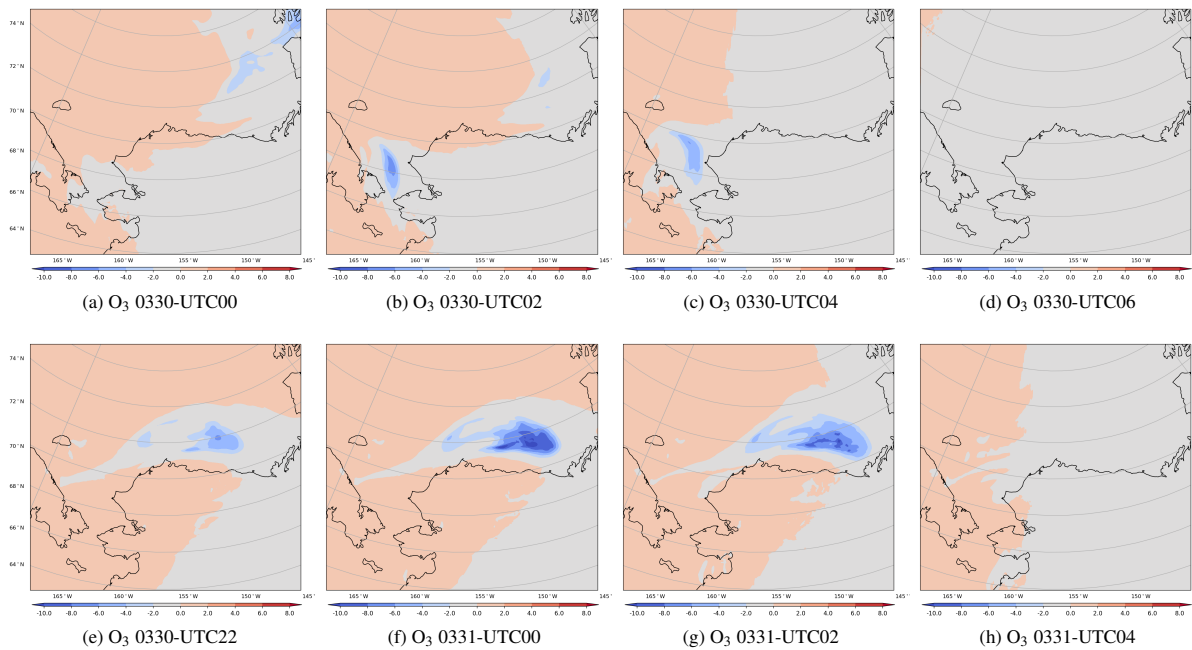

**Figure S9.** The change of surface ozone (ppb) caused by local chemistry from March 30th to March 31st, 2019, with a time resolution of 2 hrs. The positive value represents a chemical production of ozone, while the negative value represents a chemical consumption of ozone.
